# Supplementary material for: Functional analysis and development of a CRISPR/Cas9 allelic series for a CPR5 ortholog necessary for proper growth of soybean trichomes
Source: Sci Rep. 2019 Oct 14;9:14757. doi: 10.1038/s41598-019-51240-7 (PMC6791840; doi:10.1038/s41598-019-51240-7)
Supplement: Supplementary file 1 — Supplemental Files [file 41598_2019_51240_MOESM1_ESM.pdf]

## Supplementary Material

### **Functional analysis and development of a CRISPR/Cas9 allelic series for a CPR5 ortholog necessary for proper growth of soybean trichomes**

\*Benjamin W. Campbell<sup>1</sup>, Jacob W. Hoyle<sup>2</sup>, Bruna Bucciarelli<sup>1,3</sup>, Adrian O. Stec<sup>1</sup>, Deborah A. Samac<sup>3,4</sup>, Wayne A. Parrott<sup>2</sup>, \*Robert M. Stupar<sup>1</sup>

<sup>1</sup> Department of Agronomy and Plant Genetics, University of Minnesota, St. Paul, MN, U.S.A.

<sup>2</sup> Department of Crop and Soil Sciences, University of Georgia, Athens, GA, U.S.A.

<sup>3</sup> USDA-ARS-Plant Science Research Unit, St. Paul, MN, U.S.A.

<sup>4</sup> Department of Plant Pathology, University of Minnesota, St. Paul, MN, U.S.A.

\* Co-corresponding authors:

Benjamin W. Campbell [campb964@umn.edu](mailto:campb964@umn.edu)

Robert M. Stupar [stup0004@umn.edu](mailto:stup0004@umn.edu)

**Supplementary Table 1. List of deletions in R59C46 detected by array Comparative Genomic Hybridization (aCGH)**

| Chromosome | Start Probe | End Probe | Type                                      | Notes              |
|------------|-------------|-----------|-------------------------------------------|--------------------|
| Gm03       | 22444873    | 22783786  | Homozygous deletion in genic region       |                    |
| Gm03       | 39355165    | 39364339  | Homozygous deletion in genic region       |                    |
| Gm06       | 4238463     | 4238908   | Heterozygous deletion in non-genic region |                    |
| Gm06       | 11844851    | 11902734  | Homozygous deletion in genic region       | Causative deletion |
| Gm08       | 11460811    | 11508424  | Homozygous deletion in genic region       |                    |
| Gm12       | 10379033    | 10381278  | Homozygous deletion in non-genic region   |                    |

**Supplementary Table 2. Gene models located in the chromosome 6 deletion (Gm06: 11844488-11903108; Glyma.Wm82.a2.v1) in R59C46. The candidate gene is Glyma.06g145800.**

| <b>Gene Name</b> | <b>Position (Genome version Glyma.Wm82.a2.v1)</b> | <b>Annotation</b>                                                                                                     | <b>Best Arabidopsis TAIR10 hit</b>                                     | <b>Best arabidopsis TAIR10 hit symbol</b> |
|------------------|---------------------------------------------------|-----------------------------------------------------------------------------------------------------------------------|------------------------------------------------------------------------|-------------------------------------------|
| Glyma.06g145300  | Gm06:11849535..11851671                           | PF00141 (Peroxidase)                                                                                                  | AT5G05340.1 (Peroxidase superfamily protein)                           |                                           |
| Glyma.06g145400  | Gm06:11863821..11866022                           | PF03195 (Protein of unknown function DUF260)                                                                          | AT2G40470.1 (LOB domain-containing protein 15)                         | ASL11, LBD15                              |
| Glyma.06g145500  | Gm06:11873447..11878561                           | PF00560 (Leucine Rich Repeat),<br>PF08263 (Leucine rich repeat N-terminal domain),<br>PF00069 (Protein kinase domain) | AT5G10020.1 (Leucine-rich receptor-like protein kinase family protein) |                                           |
| Glyma.06g145600  | Gm06:11879451..11879931                           |                                                                                                                       |                                                                        |                                           |
| Glyma.06g145700  | Gm06:11882177..11896120                           | PF03109 (ABC1 family)                                                                                                 | AT5G64940.1 (ABC2 homolog 13)                                          | ATATH13, ATH13, ATOSA1, OSA1              |
| Glyma.06g145800  | Gm06:11896583..11900105                           |                                                                                                                       | AT5G64930.1 (CPR5 protein, putative)                                   | CPR5, HYS1                                |

**Supplementary Table 3. PCR primers designed to amplify across the chromosome 6 deletion (Gm06: 11844488-11903108; Glyma.Wm82.a2.v1) in mutant R59C46.**

| Primer Name           | Primer Sequence          | Notes                                                                                                                                 |
|-----------------------|--------------------------|---------------------------------------------------------------------------------------------------------------------------------------|
| "Primer 1" B271F      | TTTTTCATGCCTAGACGTTGG    | Use with B271R. Primer to span deletion on Chr 6 for the R59C46. Mutant 586 bp amplicon                                               |
| "Primer 2" B271R      | TTTCTGTTGAGTTTTGTAAACACC | Use with B271F. Primer to span deletion on Chr 6 for the R59C46. Mutant 586 bp amplicon                                               |
| "Primer 3" B272 F2 WT | AAGAGCCACACAAATTGATGC    | Primer to amplify wild-type band 955 bp (vs mutant 586 bp) when used with B271R (To make primer triple use: B271F, B272 F2 WT, B271R) |

**Supplementary Table 4. Sequences and PCR primers used in the creation and testing of the CRISPR/Cas9 construct**

| Primer Name          | Primer Sequence                                         | Notes                                      |
|----------------------|---------------------------------------------------------|--------------------------------------------|
|                      |                                                         |                                            |
| gRNA for GmCPR5      | GGCGGCGAACAAGAACTCTA                                    | guide RNA sequence                         |
|                      |                                                         |                                            |
| LT-PCR-1             | CAGATCCGTTGACAAAAAGCCT                                  | Used in Long-Range PCR to detect Cas9      |
| LT-PCR-2             | CCATTTCCATTTACAGTTCG                                    | Used in Long-Range PCR to detect Cas9      |
|                      |                                                         |                                            |
| RT-PCR-1             | CATATGATCAAATTCGGGGACACTTC                              | Used in RT-PCR to test for Cas9 expression |
| RT-PCR-2             | AAAGGTCTGCGTACTGGTCGCC                                  | Used in RT-PCR to test for Cas9 expression |
|                      |                                                         |                                            |
| cpr5_1180F           | CTTCACTGAAATTGCGACCC                                    | Use to genotype the CRISPR target site     |
| cpr5_2082R           | TTGTGGCCAAAATCAGGG                                      | Use to genotype the CRISPR target site     |
|                      |                                                         |                                            |
| MtU6_Promoter_Primer | TAACTATGTGCTTTGGATCTGCCCAAT<br>GCCTATCTTATATGATCAATGAGG | Used to amplify the MtU6 promoter          |

**a**

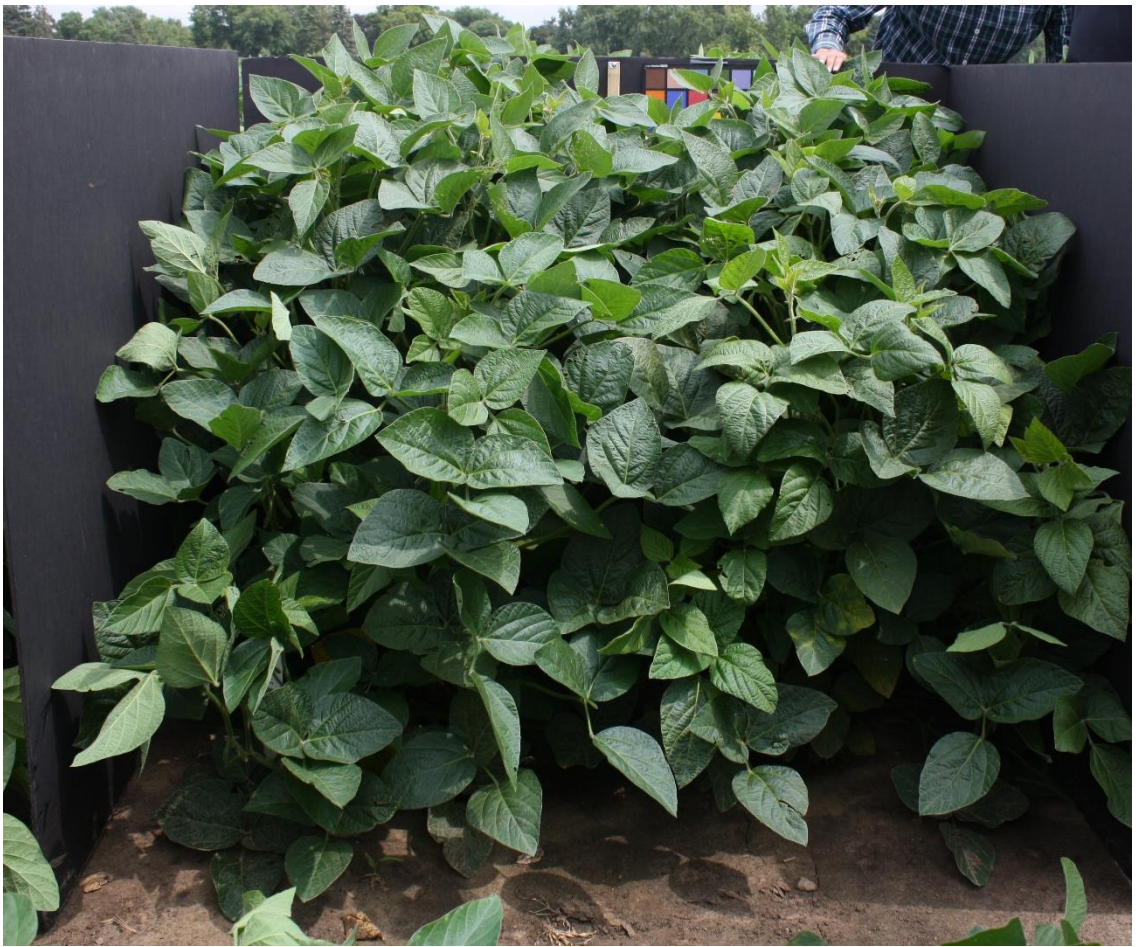

**b**

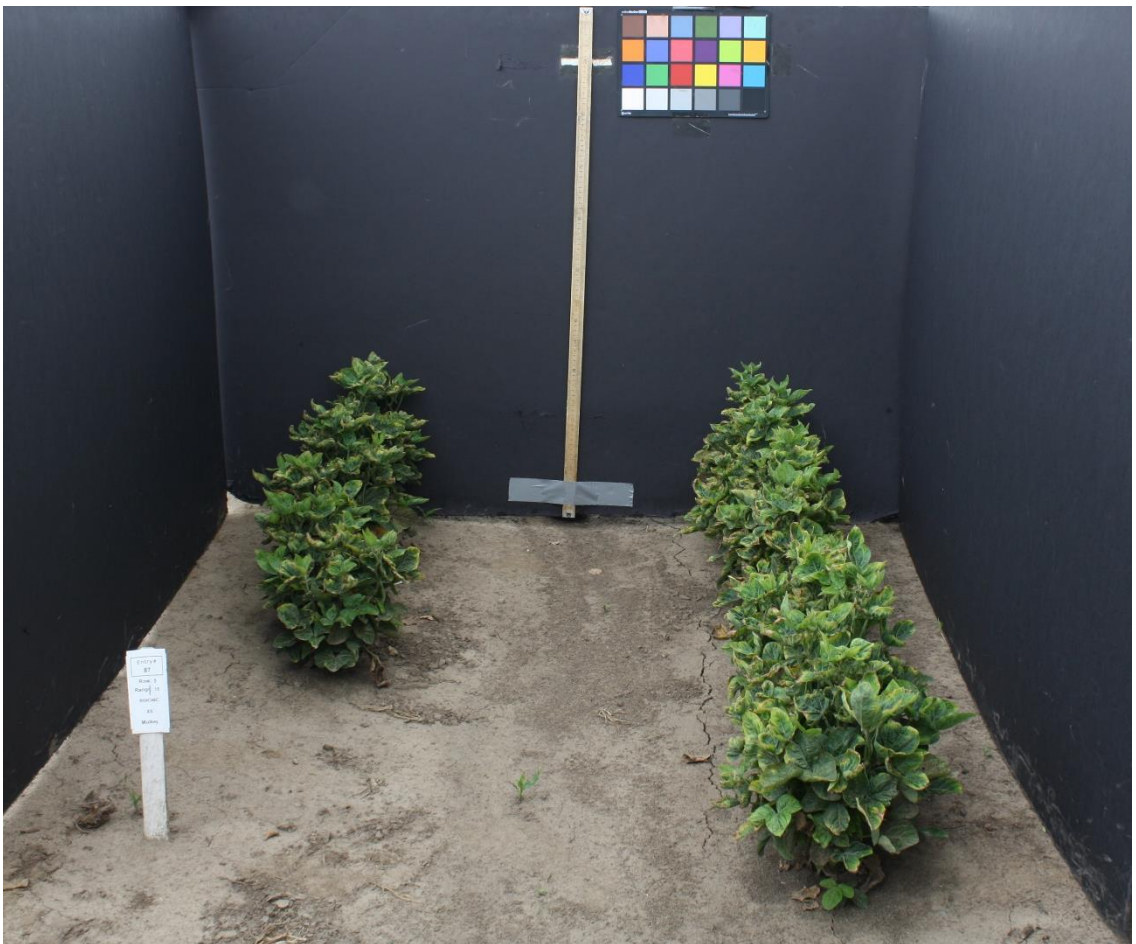

**Supplementary Fig. S1.** Relative growth and stature of wild-type M92-220 (a) and mutant R59C46 (b) when grown in field conditions. A meter stick is shown to scale the sizes of both images, though only the top of it is visible in part (a).

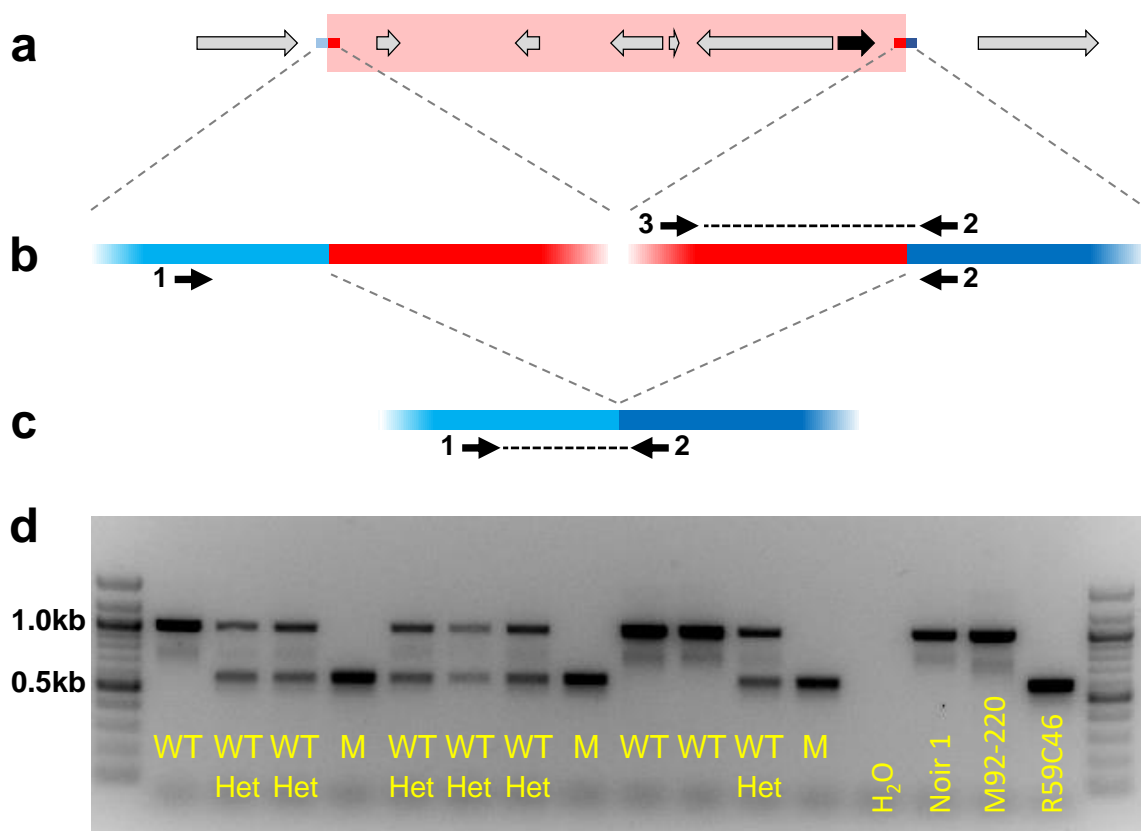

**Supplementary Fig. S2.** The fast neutron induced deletion detected on chromosome 6, the approximate positions of the primers used to span the deletion, and the co-segregation of the chromosome 6 deletion with the trichome phenotype. (a) The positions of two genes outside of the deletion and six genes within the deletion are indicated with arrows. The solid black arrow is used to indicate the candidate gene. The deletion is indicated by a light red box. (b) and (c) a magnification of the sequences at the edges of the deletion in wild-type and mutant plants, respectively. The sequences upstream and downstream of the deletion are colored in light blue and dark blue, respectively, and the deleted sequence is colored in red. The position and direction of the primers used for PCR are indicated with arrows. Primers 1 and 2 were used to amplify across the deletion. Primers 2 and 3 were used to generate an amplicon for the wild-type locus (without the deletion). The deletion was found to be a simple deletion with no additional sequence found in the deletion and no complex rearrangements. (d) PCR was performed on the segregating  $F_2$  population to assay co-segregation of the deletion and the trichome phenotype. Primers 1, 2, and 3 were used together to generate a primer triple. The primers 1 and 2 generated a 586 bp amplicon across the chromosome 6 deletion. Primers 2 and 3 generated a 955 bp amplicon in wild-type individuals. Both amplicons were visible in heterozygous individuals. Mutant individuals are labeled as “M”, homozygous wild-type individuals are labeled as “WT”, and wild-type individuals that are heterozygous for the deletion are labeled as “WT Het”. Perfect recessive co-segregation of the deletion and the mutant phenotype was observed among the 96  $F_2$  individuals tested. From left: 12 progeny, no template control, ‘Noir 1’, M92-220, and R59C46.

|                             |                                |                                |
|-----------------------------|--------------------------------|--------------------------------|
| Wm82 Gm06:11844458-11844487 | CTCATTTAATTTGATGAGTTTTTATGTGAG |                                |
| Wm82 Gm06:11903109-11903138 |                                | CAATCGATATTATCTTAAATAGTAATTGAT |
| R59C46 at the Gm06 Deletion | CTCATTTAATTTGATGAGTTTTTATGTGAG | CAATCGATATTATCTTAAATAGTAATTGAT |

**Supplementary Fig. S3.** Sequence at the junction of the two sides of the chromosome 6 deletion in R59C46. The light blue box indicates the sequence upstream of the deletion, and the dark blue box indicates the sequence downstream of the deletion. The figure shows 30 bp upstream and downstream from the deletion (Gm06: 11844488-11903108) which perfectly match with the corresponding sequences in Glyma.Wm82.a2.v1.1. No insertions, inversions, or translocations were observed within the deletion.

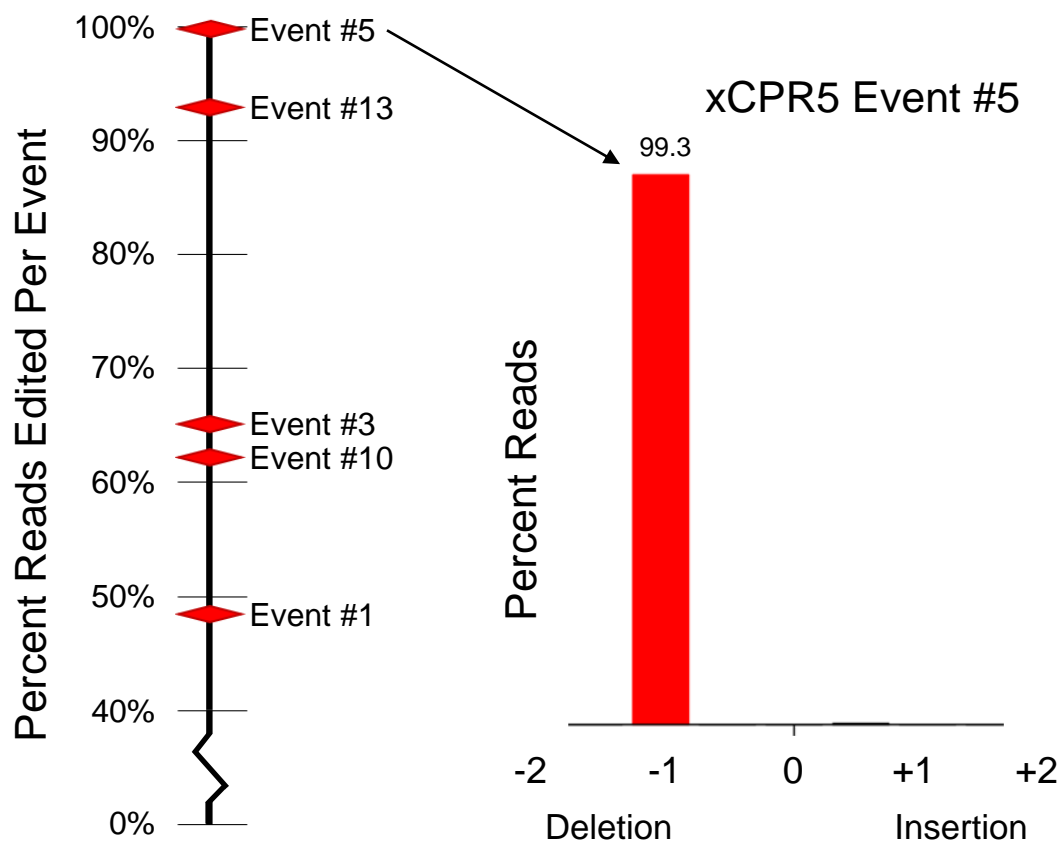

**Supplementary Fig. S4.** Total editing in five xCPR5 events at 10 weeks, as determined by TIDE. Red diamonds represent individual transgenic events. The panel on the right shows the relative frequency of indel sizes from transgenic event #5. Almost all of the indels in this event (99.3%) were 1 bp deletions.

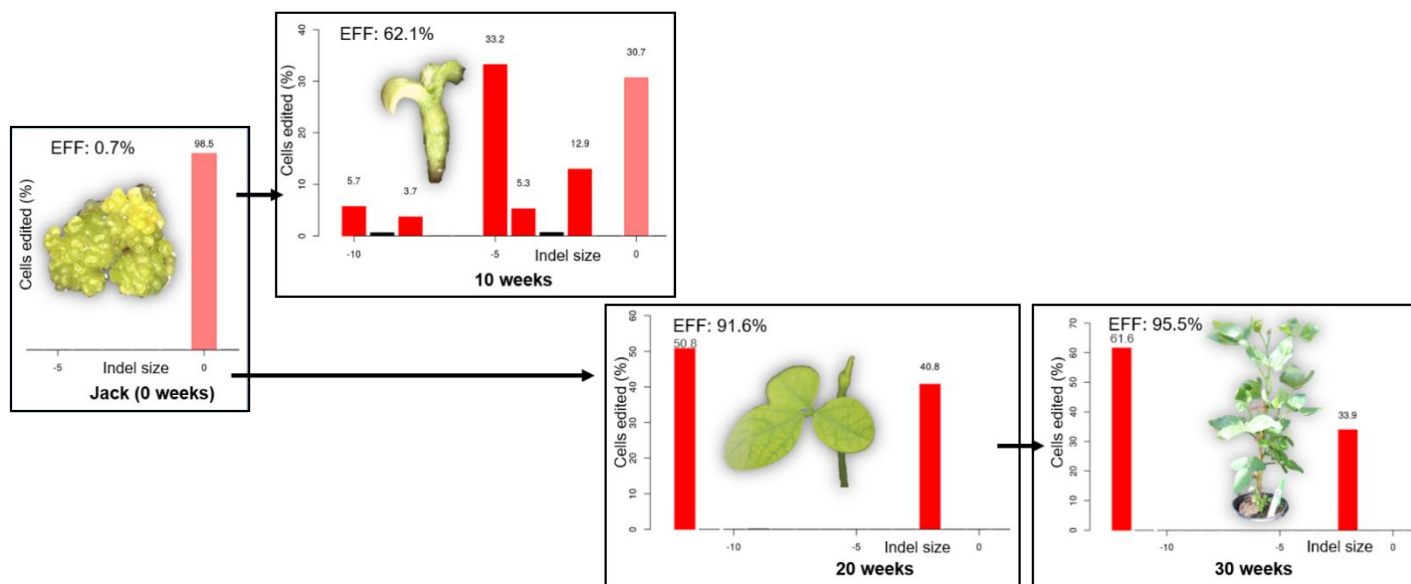

**Supplementary Fig. S5.** Editing over time in xCPR5 #3-1. TIDE output shows the composition of indels detected in the amplicons produced at the target site in *GmCPR5*. Photographs indicate developmental stage and phenotype of the event. The timeline is approximately: 0 weeks for the embryogenic cell line; 10 weeks for the mature somatic embryo; 20 and 30 weeks for plants.

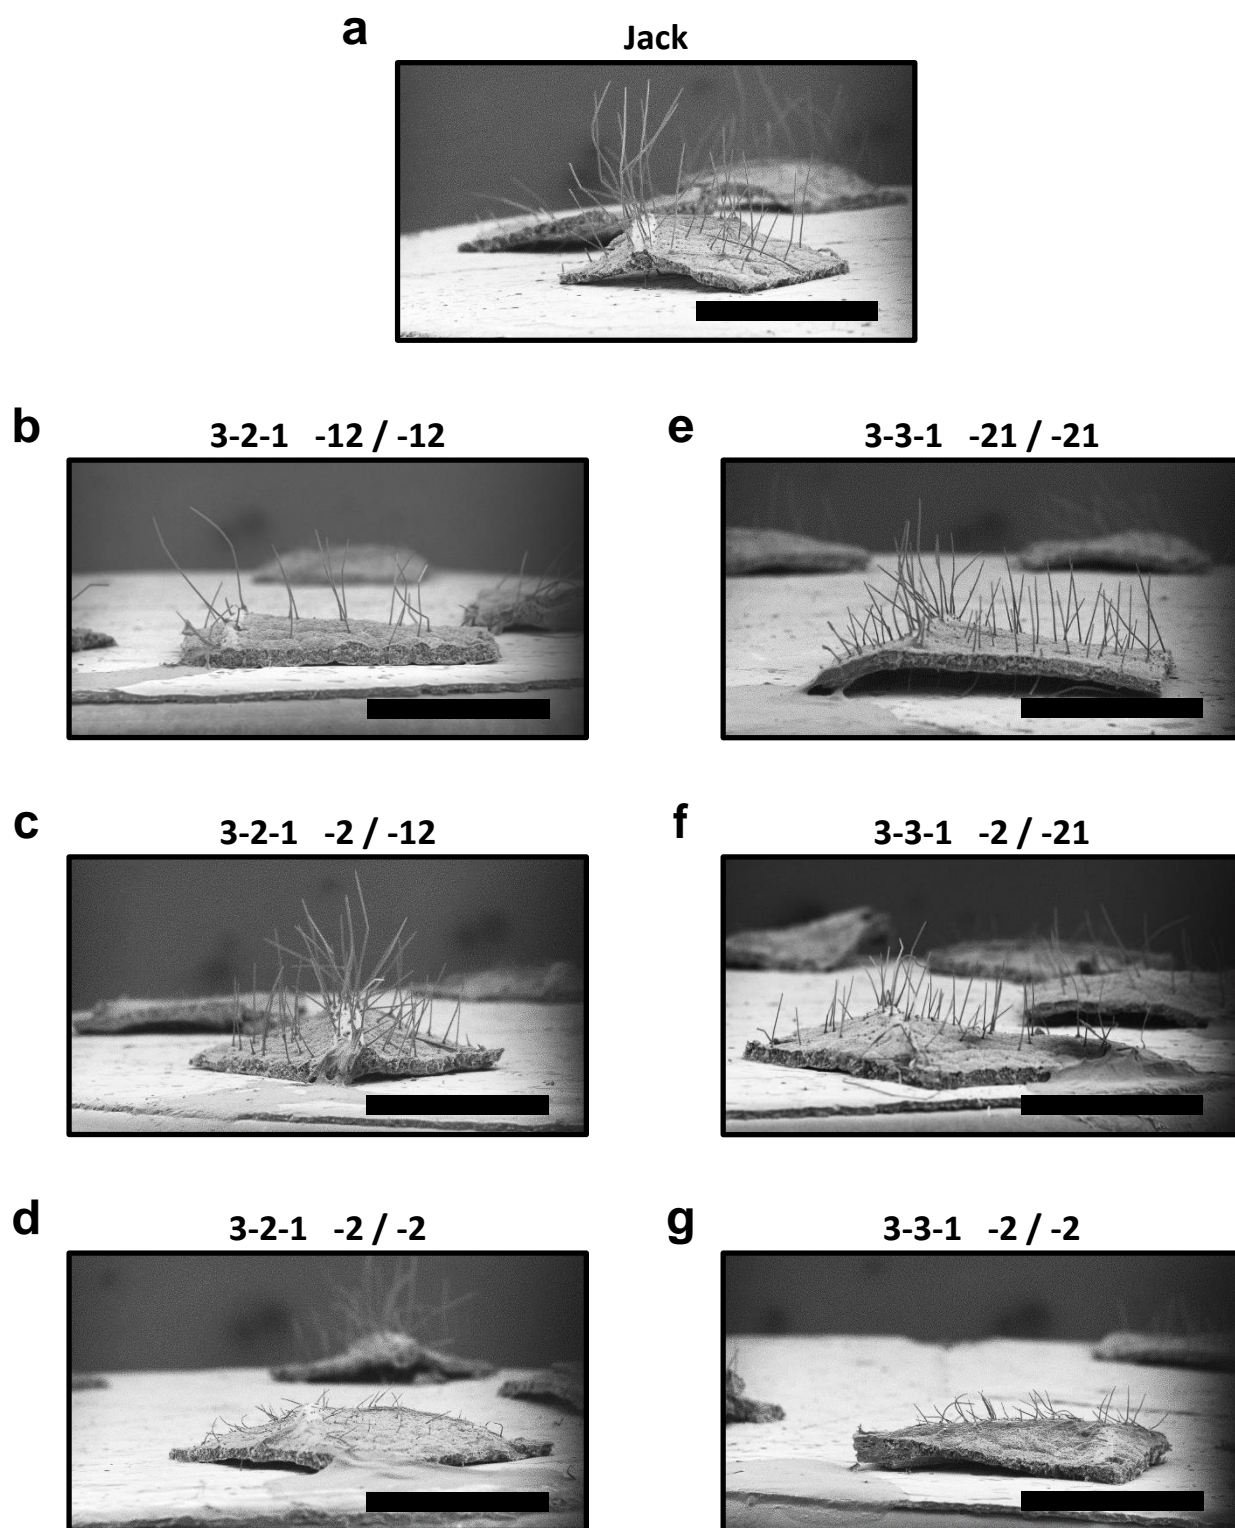

**Supplementary Fig. S6.** Scanning electron microscope trichome images of (a) ‘Jack’ and segregating  $T_2$  mutant progeny with attached image labels indicating the source heterozygous  $T_1$  individual and the genotype of the displayed  $T_2$  progeny: (b) 3-2-1 with -12 / -12, (c) 3-2-1 with -2 / -12, (d) 3-2-1 with -2 / -2, (e) 3-3-1 with -21 / -21, (f) 3-3-1 with -2 / -21, and (g) 3-3-1 with -2 / -2. The size bar in each of the images is 2.5 mm.

|                                          |                                                      |
|------------------------------------------|------------------------------------------------------|
| Consensus                                | SSKSKQKGKRVSFKRRNPRVRFGPVRRHRGNNVDITIGLPLGMSFAAVMAQ  |
| <i>Glycine max</i> Wild-Type             | RKEN.G...AAA.....L---.....A.....                     |
| xCPR5 #3-2                               | RKEN.G...AAA..... <b>Sxx</b> --- <b>xx</b> ...A..... |
| xCPR5 #3-3                               | RKEN.G...AAA..... <b>xx</b> --- <b>xxxxx</b> A.....  |
| <i>Cajanus cajan</i>                     | .R.G.G...GAA.....S..L---.....A.....                  |
| <i>Vigna radiata</i> var. <i>radiata</i> | .R.R.S...KL.....S.V---.....A.....                    |
| <i>Vigna angularis</i>                   | .R.R.S...K.....S.V---.....T.....                     |
| <i>Phaseolus vulgaris</i>                | --.RRG.S...LL.....S.V---.....T...N...L..I...T..      |
| <i>Medicago truncatula</i>               | --RT.V...GIAC.....S---...T....AA..F....V.....        |
| <i>Arachis ipaensis</i>                  | VR.T.R.--.A.....AV--A..K...-.E.....                  |
| <i>Arachis duranensis</i>                | VR.T.R.--.A.....S..AV--A..K...-.E.....               |
| <i>Lupinus angustifolius</i>             | -.S.L....--I.....HV--...IK.-D.SA.....                |
| <i>Gossypium barbadense</i>              | Y.S.V...M.L.S....L.....ADVLD..S.A.....V..            |
| <i>Durio zibethinus</i>                  | ..S.I.R.M.....T.....SEVRD..F.A.....V..               |
| <i>Herrania umbratica</i>                | C.S.I.R.TSLP...VS.....SKVGD.ES.A.....V..             |
| <i>Theobroma cacao</i>                   | C.S.I.R.T..P...IT.....SEVGD.ES.A.....V..             |
| <i>Corchorus capsularis</i>              | C.S.I.R.T...SR..F.....A..VEVGD.ES.A.....V..          |
| <i>Helianthus annuus</i>                 | VLH.RT..V...NN.....FS.GL..RN.GEA.ALA.....I..FVV.     |

**Supplementary Fig. S7.** Amino acid alignment of *Glycine max*, CRISPR mutants, and *CPR5* orthologs surrounding the residues affected by CRISPR mutations. The figure contains sequence alignments of wild-type *Glycine max CPR5*, the in-frame CRISPR mutant alleles from xCPR5 #3-2 and xCPR5 #3-3, and *CPR5* orthologs from several species. In the species sequence alignments, the dots indicate conserved amino acids and dashes indicate spaces in the sequence alignment. Mutations in xCPR5 #3-2 and xCPR5 #3-3 are indicated by bold text. The deleted amino acids in xCPR5 #3-2 and xCPR5 #3-3 are indicated by a bold ‘x’, and the amino acid sequence change of R to S is indicated in bold in the xCPR5 #3-2 sequence. The two vertical grey boxes highlight conserved amino acids that were deleted in xCPR5 #3-2 and #3-3.

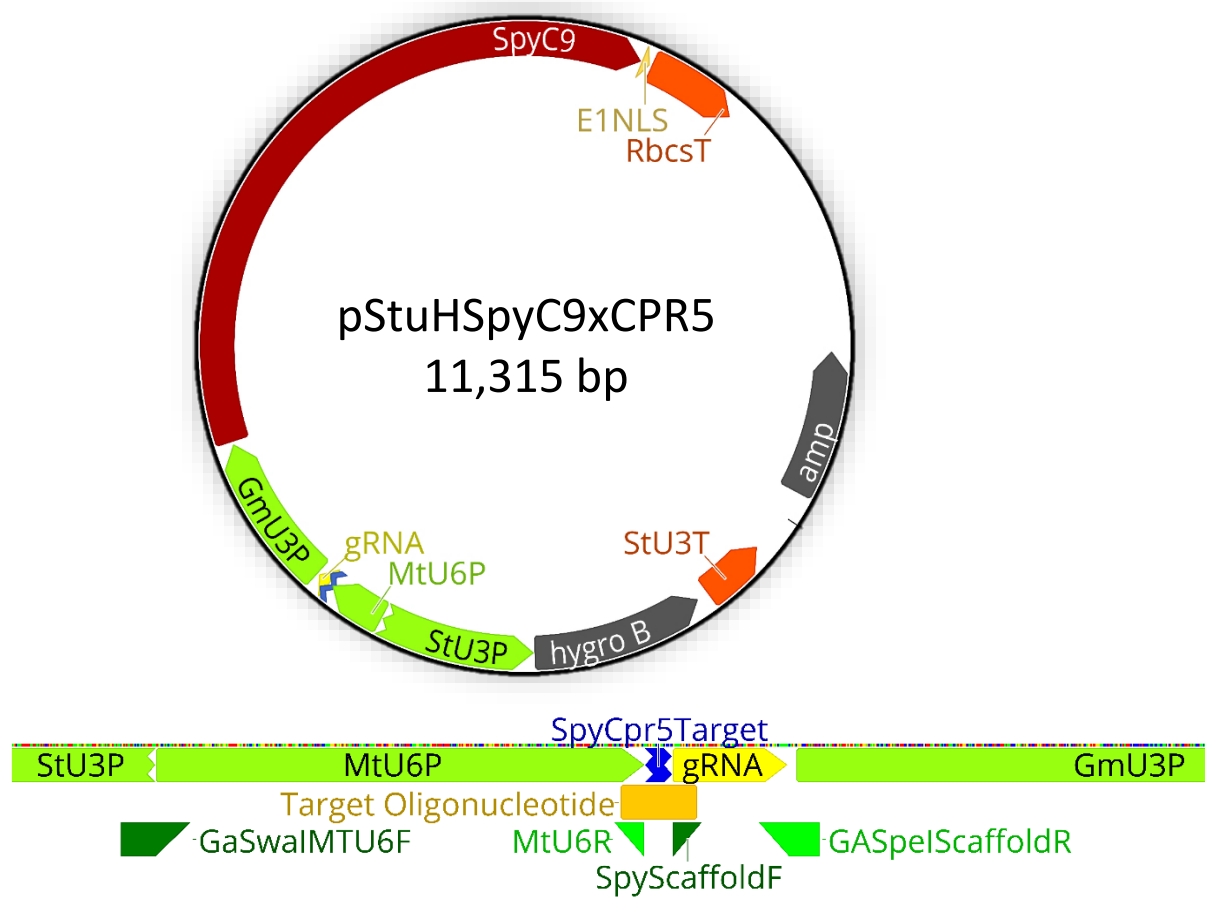

**Supplementary Fig. S8.** *GmCPR5* CRISPR knockout construct and details of the gRNA cassette.
